# Supplementary material for: A Sensitive and Rapid Wastewater Test for SARS-COV-2 and Its Use for the Early Detection of a Cluster of Cases in a Remote Community
Source: PubMed Central journal article supplement (PMC8904056; doi:10.1128/aem.01740-21), 2022-03-08
Supplement: aem.01740-21-s0001.pdf [file aem.01740-21-s0001.pdf]

**Supplementary Material:**

**Supplementary Table 1:** List of SARS-CoV-2 Primers and Probes used for the Laboratory-Developed q-RT-PCR Test (Source, US Centers for Disease Control and Prevention).

| <b>Assay</b> | <b>Oligonucleotide</b>      | <b>Sequence (5' -- 3')</b>              | <b>Concentration (μM)</b> |
|--------------|-----------------------------|-----------------------------------------|---------------------------|
| N1           | 2019-nCoV_N1 forward primer | GAC CCC AAA ATC AGC GAA AT              | 0.5                       |
|              | 2019-nCoV_N1 reverse primer | TCT GGT TAC TGC CAG TTG AAT CTG         | 0.5                       |
|              | 2019-nCoV_N1 reverse probe  | FAM-ACC CCG CAT TAC GTT TGG TGG ACC-NFQ | 0.125                     |
| N2           | 2019-nCoV_N2 forward primer | TTA CAA ACA TTG GCC GCA AA              | 0.5                       |
|              | 2019-nCoV_N2 reverse primer | GCG CGA CAT TCC GAA GAA                 | 0.5                       |
|              | 2019-nCoV_N2 reverse probe  | FAM-ACA ATT TGC CCC CAG CGC TTC AG-NFQ  | 0.125                     |

**Supplementary Table 2:** Standard Curve Parameters for the N1 and N2 primers used for the laboratory-developed wastewater test in this study.

|                      | <b>N1</b> | <b>N2</b> |
|----------------------|-----------|-----------|
| <b>Slope</b>         | -3.36     | -3.43     |
| <b>Intercept</b>     | 36.27     | 37.02     |
| <b>R<sup>2</sup></b> | 0.9979    | 0.9965    |
| <b>Efficiency</b>    | 98.44     | 95.68     |

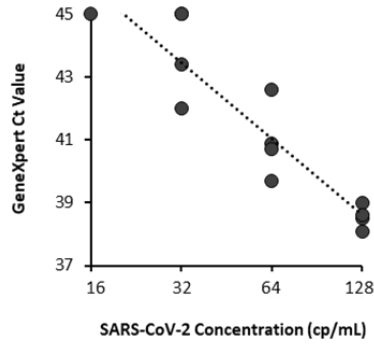

| Input Concentration (cp/mL) | GeneXpert CT value |              |               |               |
|-----------------------------|--------------------|--------------|---------------|---------------|
|                             | Replicate # 1      | Replicate #2 | Replicate #3  | Replicate #4  |
| 128                         | 38.5               | 38.1         | 39.0          | 38.6          |
| 64                          | 39.7               | 40.9         | 40.7          | 42.6          |
| 32                          | 42                 | 43.3         | Endpoint Pos. | Endpoint Pos. |
| 16                          | Negative           | Negative     | Endpoint Pos. | Negative      |

**Supplementary Figure 1: Detection of SARS-CoV-2 in wastewater using the GeneXpert system.** Gamma irradiated SARS-CoV-2 culture fluid was diluted in wastewater to final concentrations between 16 – 128 copies (cp/mL). All points in the dilution series were tested using four independent replicates, diluted in negative wastewater samples collected from four locations across Canada. All inputs of greater than 32 cp/mL were identified as positive or endpoint positive (pos.) on the GeneXpert system.

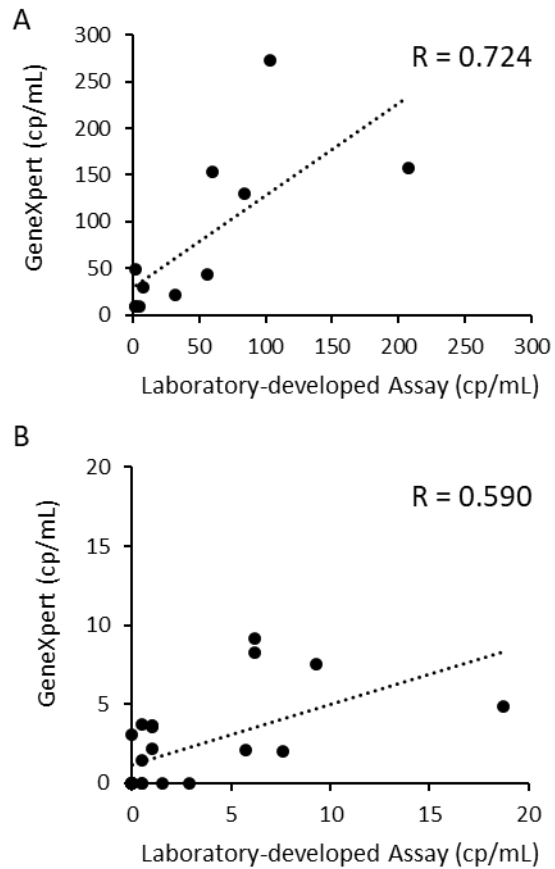

**Supplementary Figure 2: Correlation of GeneXpert (with Amicon concentration) and laboratory-developed assay for the quantification of SARS-CoV-2 in wastewater.** (A) Correlation of SARS-CoV-2 quantification with the GeneXpert and laboratory-developed assay using input wastewater samples collected from multiple sites across Canada (See Fig 2B). (B) Correlation of SARS-CoV-2 quantification with the GeneXpert and laboratory-developed assay using input wastewater samples collected from Yellowknife Lift Station 5 (See Fig 3A).
